# Supplementary material for: Developing Consensus-Based POCUS Training Guidelines for Korean Emergency Medicine: Results from the Expert Delphi Survey
Source: Research Square preprint supplement (doi:10.21203/rs.3.rs-7371688/v1), 2025-10-08
Supplement: Supplementary file 1 [file 638c690fca96d52793cf3ec2.pdf]

## Supplementary Questionnaire

**Study Title:** Photoplethysmography- and Fluid Index–Based Prediction of Dehydration

**Participant Number:** \_\_\_\_\_

### Section A. Inclusion/Exclusion Criteria

(1) Do you meet the following conditions?

- You have at least **3 years of clinical teaching experience.** ( )
- You have performed at least **150 POCUS scans.** ( )

[Mark **O** if satisfied, **X** if not]

### Section B. Demographics

1. Which specialty board certification have you obtained?

- ☐ ( ) Emergency Medicine
- ☐ ( ) Other clinical specialty: \_\_\_\_\_

2. How many years of clinical experience do you have after obtaining board certification?

- ☐ Approximately \_\_\_\_ years (rounded to the nearest year)

| Skill/Application          |        |         | Indicate the level of importance on a 1–9 scale                      |   |   |   |   |   |   |   |   |
|----------------------------|--------|---------|----------------------------------------------------------------------|---|---|---|---|---|---|---|---|
|                            |        |         | 1                                                                    | 2 | 3 | 4 | 5 | 6 | 7 | 8 | 9 |
| Resuscitative applications | Trauma | E-FAST  | Identify free fluid of Hepatorenal recess                            |   |   |   |   |   |   |   |   |
|                            |        |         | Identify free fluid of Splenorenal recess                            |   |   |   |   |   |   |   |   |
|                            |        |         | Identify free fluid of Peribladder                                   |   |   |   |   |   |   |   |   |
|                            |        |         | Identify free fluid of Pericardium                                   |   |   |   |   |   |   |   |   |
|                            |        |         | Identify pericardial tamponade                                       |   |   |   |   |   |   |   |   |
|                            |        |         | Identify acute pneumothorax                                          |   |   |   |   |   |   |   |   |
|                            |        |         | Identify Pleural fluid                                               |   |   |   |   |   |   |   |   |
|                            |        | IVC     | Gross estimation of intravascular volume status and cardiac preload. |   |   |   |   |   |   |   |   |
|                            | Aorta  |         | Identify Abdominal Aortic Dissection                                 |   |   |   |   |   |   |   |   |
|                            |        |         | Identify Thoracic Aortic dissection                                  |   |   |   |   |   |   |   |   |
|                            | CPR    | Cardiac | Identify free fluid of Pericardium                                   |   |   |   |   |   |   |   |   |
|                            |        |         | Identify Pericardial tamponade                                       |   |   |   |   |   |   |   |   |
|                            |        |         | Global left ventricular systolic function                            |   |   |   |   |   |   |   |   |
|                            |        |         | Global Right ventricular systolic function                           |   |   |   |   |   |   |   |   |
|                            | Heart  |         | Identify free fluid of Pericardium                                   |   |   |   |   |   |   |   |   |
|                            |        |         | Identify Pericardial tamponade                                       |   |   |   |   |   |   |   |   |
|                            |        |         | Global left ventricular systolic function                            |   |   |   |   |   |   |   |   |
|                            |        |         | Global Right ventricular systolic function                           |   |   |   |   |   |   |   |   |
|                            |        |         | Regional Wall motion Abnormality                                     |   |   |   |   |   |   |   |   |
|                            |        |         | Global Left ventricular diastolic function                           |   |   |   |   |   |   |   |   |
|                            |        |         | Right ventricular pressure                                           |   |   |   |   |   |   |   |   |
|                            | GV     |         | Identify Abdominal Aortic Aneurysm.                                  |   |   |   |   |   |   |   |   |
|                            |        |         | Identify Abdominal Aortic Dissection                                 |   |   |   |   |   |   |   |   |
|                            |        |         | Identify Thoracic Aortic dissection                                  |   |   |   |   |   |   |   |   |
|                            |        |         | Identify Thoracic Aortic Aneurysm.                                   |   |   |   |   |   |   |   |   |
|                            |        |         | Identify Iliac, splenic, celiac artery Aneurysm.                     |   |   |   |   |   |   |   |   |
|                            |        |         | Identify Iliac, splenic, celiac artery Dissection                    |   |   |   |   |   |   |   |   |
|                            | Shock  | IVC     | Gross estimation of intravascular volume status and cardiac preload. |   |   |   |   |   |   |   |   |
|                            |        |         | VTI variation                                                        |   |   |   |   |   |   |   |   |
|                            |        | LVOT    | Stroke volume estimation                                             |   |   |   |   |   |   |   |   |
|                            |        |         |                                                                      |   |   |   |   |   |   |   |   |
|                            |        | E-FAST  | Identify free fluid of Hepatorenal recess                            |   |   |   |   |   |   |   |   |
|                            |        |         | Identify free fluid of Splenorenal recess                            |   |   |   |   |   |   |   |   |
|                            |        |         | Identify free fluid of Peribladder                                   |   |   |   |   |   |   |   |   |
|                            |        |         | Identify free fluid of Pericardium                                   |   |   |   |   |   |   |   |   |
|                            |        |         | Identify pericardial tamponade                                       |   |   |   |   |   |   |   |   |
|                            |        |         | Lung sliding                                                         |   |   |   |   |   |   |   |   |
|                            |        |         | Identify Pleural fluid                                               |   |   |   |   |   |   |   |   |
|                            |        | GV      | Identify Abdominal Aortic Dissection                                 |   |   |   |   |   |   |   |   |
|                            |        |         | Identify Thoracic Aortic dissection                                  |   |   |   |   |   |   |   |   |
|                            |        |         | Identify Abdominal Aortic Aneurysm.                                  |   |   |   |   |   |   |   |   |
|                            |        |         | Identify Thoracic Aortic Aneurysm.                                   |   |   |   |   |   |   |   |   |

| Skill/Application      |                 |            | Indicate the level of importance on a 1–9 scale   |   |   |   |   |   |   |   |   |
|------------------------|-----------------|------------|---------------------------------------------------|---|---|---|---|---|---|---|---|
|                        |                 |            | 1                                                 | 2 | 3 | 4 | 5 | 6 | 7 | 8 | 9 |
| Diagnostic application | Hepatobiliary   |            | Cholelithiasis                                    |   |   |   |   |   |   |   |   |
|                        |                 |            | Cholecystitis                                     |   |   |   |   |   |   |   |   |
|                        |                 |            | Choledocholithiasis                               |   |   |   |   |   |   |   |   |
|                        |                 |            | Pneumobilia                                       |   |   |   |   |   |   |   |   |
|                        |                 |            | Hepatomegaly                                      |   |   |   |   |   |   |   |   |
|                        |                 |            | Fatty liver                                       |   |   |   |   |   |   |   |   |
|                        |                 |            | Liver abscess                                     |   |   |   |   |   |   |   |   |
|                        |                 |            | Liver tumor                                       |   |   |   |   |   |   |   |   |
|                        |                 |            | Portal vein abnormalities                         |   |   |   |   |   |   |   |   |
|                        |                 |            | GB abnormality except Cholecystitis and GB stone. |   |   |   |   |   |   |   |   |
|                        |                 |            | ascites                                           |   |   |   |   |   |   |   |   |
|                        | Lung and pleura |            | Identify acute pneumothorax                       |   |   |   |   |   |   |   |   |
|                        |                 |            | Identify Pleural fluid                            |   |   |   |   |   |   |   |   |
|                        |                 |            | Pulmonary edema                                   |   |   |   |   |   |   |   |   |
|                        |                 |            | Interstitial Lung disease                         |   |   |   |   |   |   |   |   |
|                        |                 |            | Pneumonia                                         |   |   |   |   |   |   |   |   |
|                        |                 |            | pulmonary fibrosis                                |   |   |   |   |   |   |   |   |
|                        | Ocular          | Non trauma | Retinal detachment                                |   |   |   |   |   |   |   |   |
|                        |                 |            | Vitreous hemorrhage                               |   |   |   |   |   |   |   |   |
|                        |                 |            | central retinal artery/vein occlusion             |   |   |   |   |   |   |   |   |
|                        |                 |            | subretinal hemorrhage                             |   |   |   |   |   |   |   |   |
|                        |                 |            | posterior vitreous detachment                     |   |   |   |   |   |   |   |   |
|                        |                 |            | direct and consensual light reflex                |   |   |   |   |   |   |   |   |
|                        |                 | trauma     | lens dislocation                                  |   |   |   |   |   |   |   |   |
|                        |                 |            | Intraocular foreign body                          |   |   |   |   |   |   |   |   |
|                        |                 |            | Optic nerve sheath diameter measurement           |   |   |   |   |   |   |   |   |
|                        |                 |            | Retrobulbar hemorrhage                            |   |   |   |   |   |   |   |   |
|                        |                 |            | Globe rupture                                     |   |   |   |   |   |   |   |   |
|                        | Kidney          |            | Cause of obstructive uropathy                     |   |   |   |   |   |   |   |   |
|                        |                 |            | Cause of acute hematuria                          |   |   |   |   |   |   |   |   |
|                        |                 |            | Kidney size measurement                           |   |   |   |   |   |   |   |   |
|                        |                 |            | infections and abscess of the kidney              |   |   |   |   |   |   |   |   |
|                        |                 |            | renal cysts and masses                            |   |   |   |   |   |   |   |   |
|                        | Scrotum         |            | Scrotal torsion                                   |   |   |   |   |   |   |   |   |
|                        |                 |            | Epididymitis                                      |   |   |   |   |   |   |   |   |
|                        | OB              |            | Ovarian cyst                                      |   |   |   |   |   |   |   |   |
|                        |                 |            | Fibroids                                          |   |   |   |   |   |   |   |   |
|                        |                 |            | Tubo-ovarian abscess                              |   |   |   |   |   |   |   |   |
|                        |                 |            | Rule out ovarian torsion                          |   |   |   |   |   |   |   |   |
|                        | Soft tissue     |            | ectopic pregnancy                                 |   |   |   |   |   |   |   |   |
|                        |                 |            | Cellulitis                                        |   |   |   |   |   |   |   |   |
|                        |                 |            | Identify soft tissue abscess                      |   |   |   |   |   |   |   |   |
|                        |                 |            | Soft tissue foreign body                          |   |   |   |   |   |   |   |   |
|                        | MS              |            | Soft tissue deep space infection identification   |   |   |   |   |   |   |   |   |
|                        |                 |            | Identify joint effusion                           |   |   |   |   |   |   |   |   |
|                        |                 |            | Fracture detection                                |   |   |   |   |   |   |   |   |
|                        |                 |            | Tendon/ligament injury detection                  |   |   |   |   |   |   |   |   |
|                        | Bowel           |            | Tenosynovitis                                     |   |   |   |   |   |   |   |   |
|                        |                 |            | Appendicitis                                      |   |   |   |   |   |   |   |   |
|                        |                 |            | Diverticulitis                                    |   |   |   |   |   |   |   |   |
|                        |                 |            | Bowel Obstruction                                 |   |   |   |   |   |   |   |   |
|                        | Procedure       |            | Pneumoperitoneum                                  |   |   |   |   |   |   |   |   |
|                        |                 |            | Procedural guidance of pericardiocentesis         |   |   |   |   |   |   |   |   |
|                        |                 |            | pacemaker wire placement and capture.             |   |   |   |   |   |   |   |   |
|                        |                 |            | Soft tissue foreign body removal                  |   |   |   |   |   |   |   |   |
|                        |                 |            | Central venous catheter insertion                 |   |   |   |   |   |   |   |   |
|                        |                 |            | Arterial line insertion                           |   |   |   |   |   |   |   |   |
|                        |                 |            | Peritonsillar abscess drain                       |   |   |   |   |   |   |   |   |
|                        |                 |            | Soft tissue abscess drain                         |   |   |   |   |   |   |   |   |
|                        |                 |            | Thoracentesis                                     |   |   |   |   |   |   |   |   |
|                        |                 |            | Paracentesis                                      |   |   |   |   |   |   |   |   |
|                        |                 |            | Guide of arthrocentesis                           |   |   |   |   |   |   |   |   |
|                        |                 |            | Fracture reduction                                |   |   |   |   |   |   |   |   |
|                        |                 |            | Lumbar puncture                                   |   |   |   |   |   |   |   |   |
|                        |                 |            | Endotracheal tube placement                       |   |   |   |   |   |   |   |   |
|                        |                 |            | Cricothyroid membrane detection                   |   |   |   |   |   |   |   |   |
|                        |                 |            | US guided nerve block                             |   |   |   |   |   |   |   |   |
